# Supplementary material for: Triple oxygen isotope composition of CO 2 in the upper troposphere and stratosphere
Source: Copernicus journal article supplement (doi:10.5194/egusphere-2024-3231), 2024-11-13
Supplement: Supplementary file 1 [file egusphere-2024-3231-supplement.pdf]

# Supplementary material for "Triple oxygen isotope composition of CO<sub>2</sub> in the upper troposphere and stratosphere"

Getachew Agmuas Adnew<sup>1</sup>, Gerbrand Koren<sup>2</sup>, Neha Mehendale<sup>1</sup>, Sergey Gromov<sup>3</sup>, Maarten Krol<sup>1,4</sup>, and Thomas Röckmann<sup>1</sup>

<sup>1</sup>Institute for Marine and Atmospheric research Utrecht (IMAU), Physics Department, Science Faculty, Utrecht University, Princetonplein 5, 3584 CC Utrecht, the Netherlands

<sup>2</sup>Copernicus Institute of Sustainable Development, Utrecht University, Princetonlaan 8a, 3584 CB Utrecht, the Netherlands

<sup>3</sup>Max Planck Institute for Chemistry, Hahn-Meitner-Weg 1, 55218 Mainz, Germany

<sup>4</sup>Meteorology and Air Quality, Wageningen University, Wageningen, the Netherlands

**Correspondence:** Getachew Agmuas Adnew (g.a.adnew@uu.nl)

Figure 11 in the main text uses the discrimination of assimilation against  $\Delta'^{17}O$  as established in Adnew et al. (2020) to parameterize the isoflux from assimilation. The results shown there are for a temperature of 15°C and relative humidity of 75%. Here we illustrate the dependence of the results on pressure and temperature.

$$\Delta_A \Delta'^{17}O = (\Delta'^{17}O_{UT} - \Delta'^{17}O_M) \times (-0.150 \times e^{3.707 \times \frac{c_m}{c_a}} + 0.028) \quad (S1)$$

- 5 Figure S1 shows the sensitivity of the discrimination against  $\Delta'^{17}O$  ( $\Delta_A \Delta'^{17}O$ ) to relative humidity and temperature. The value of  $\Delta_A \Delta'^{17}O$  increases with rising relative humidity but decreases with increasing temperature. Both relative humidity and temperature influence equation S1 through  $\Delta'^{17}O_M$  (see equation S2) (Adnew et al., 2020). An increase in relative humidity enlarges the difference between the three isotope slope of transpiration and the reference slope ( $\theta_{trans} - 0.528$ ), which lowers  $\Delta'^{17}O_M$ . This, in turn, raises the  $(\Delta'^{17}O_{UT} - \Delta'^{17}O_M)$  difference, leading to stronger discrimination (see Figure S1a). Conversely, when temperature increases, both  $\alpha_{CO_2-H_2O}$  and  $\alpha_{trans}$  decrease, resulting in a relatively enriched  $\Delta'^{17}O_M$  value. This reduces the  $(\Delta'^{17}O_{UT} - \Delta'^{17}O_M)$  difference and, consequently, leads to a lower discrimination (see Figure S1b).

$$\Delta'^{17}O_M = \Delta'^{17}O_{MW} + (\theta_{trans} - 0.528) \times \ln \alpha_{trans} + (\theta_{CO_2-H_2O} - 0.528) \times \ln \alpha_{CO_2-H_2O} \quad (S2)$$

- The mass balance model discussed in the main text solves for the GPP flux based on assumptions of several other parameters. Here we illustrate the dependence of this calculation on these assumptions. Figure S2 illustrates the dependence of Gross Primary Production (GPP) on the net isoflux of  $\Delta'^{17}O$  from the stratosphere to the troposphere ( $\Delta'^{17}O_{ST}$ -isoflux, panel a) and the  $\Delta'^{17}O$  value of the upper troposphere (panel b) for different  $c_m/c_a$  values (color bars in both panels). A higher net isoflux of  $\Delta'^{17}O$  to the troposphere leads to an increase in GPP to maintain the steady state assumption (see Equation 5 in the main text and Figure S2a). Conversely, a higher  $\Delta'^{17}O_{UT}$  results in a lower GPP, as it increases the  $\Delta_A \Delta'^{17}O$  value (see Figure S2b). Figure S3 illustrates the sensitivity of GPP to relative humidity and temperature, again with different  $c_m/c_a$  ratios indicated as

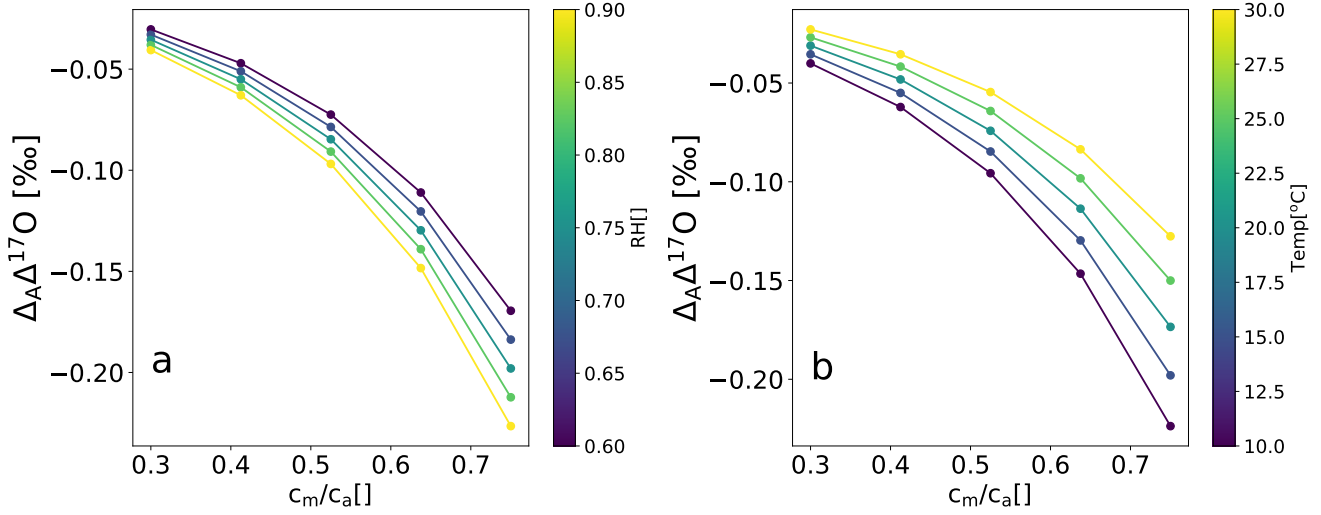

**Figure S1.** Relationship between  $c_m/c_a$  and  $\Delta_A\Delta'^{17}\text{O}$  under varying conditions of relative humidity (a) and temperature (b), based on the experiments by (Adnew et al., 2020). Relative humidity and temperature are indicated by the colour bars.

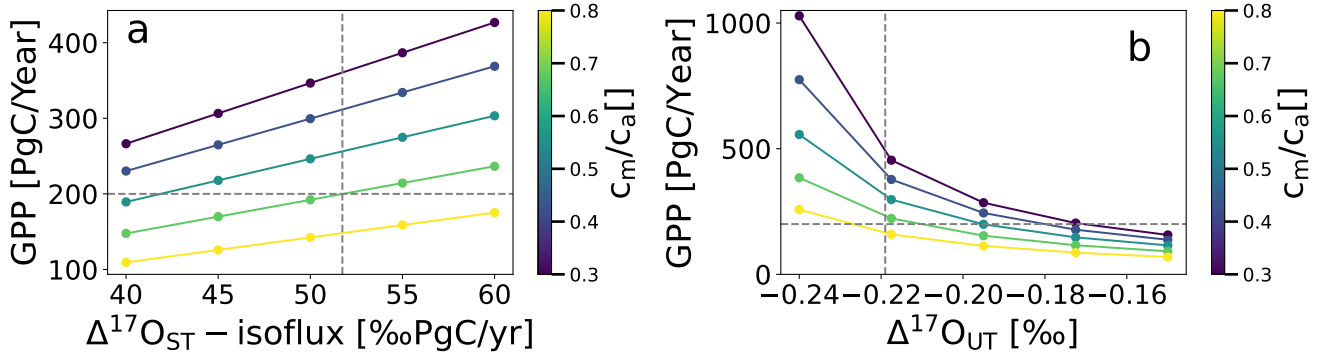

**Figure S2.** Sensitivity of GPP to the  $\Delta'^{17}\text{O}$  stratosphere-troposphere isoflux and  $\Delta'^{17}\text{O}$  value of upper troposphere. (a) The relationship between  $\Delta'^{17}\text{O}$  stratosphere-troposphere isoflux and GPP, with different  $c_m/c_a$  ratios indicated by the color bar. (b) The relationship between  $\Delta'^{17}\text{O}$  in the upper troposphere and GPP, with different  $c_m/c_a$  ratios indicated by the color bar.

20 color bars. An increase in relative humidity leads to a decrease in GPP due to an increase in  $\Delta_A\Delta'^{17}\text{O}$ . Conversely, an increase in temperature results in an increase in GPP, as higher temperatures cause a decrease in  $\Delta_A\Delta'^{17}\text{O}$ , as described above.

The  $\Delta'^{17}\text{O}$  value of  $\text{CO}_2$  equilibrated with ocean water and diffused back to the atmosphere ( $\Delta'^{17}\text{O}_o$ ) is calculated from the  $\Delta'^{17}\text{O}$  value of ocean water (OW) as  $\Delta'^{17}\text{O}_o = \Delta'^{17}\text{O}_{OW} + (\theta_{\text{CO}_2-\text{H}_2\text{O}} - 0.528) \times \ln\alpha_{\text{CO}_2-\text{H}_2\text{O}} + (\theta_{\text{diff-water}} - 0.528) \times \ln\alpha_{\text{diff-water}}$ , where  $\theta_{\text{diff-water}}$  is the oxygen triple isotope slope for  $\text{CO}_2$  diffusion in solution (water). The  $\Delta'^{17}\text{O}$  values of

**Table S1.** Information on flight numbers of the Caribic flights with the whole air sampler (WAS) from which samples were analyzed for this study, with flight dates and flight routes.

| Sample | Date         | Route                        |
|--------|--------------|------------------------------|
| WAS-25 | 28-July-2000 | Windhoek to Munich           |
| WAS-28 | 18-Oct-2000  | Male to Munich               |
| WAS-29 | 05-Nov-2000  | Male to Düsseldorf           |
| WAS-30 | 03-Dec-2000  | Capetown to Munich           |
| WAS-31 | 19-Jan-2001  | Colombo to Düsseldorf        |
| WAS-32 | 01-Apr-2001  | Colombo to Düsseldorf        |
| WAS-33 | 14-May-2001  | Holguin to Düsseldorf        |
| WAS-34 | 19-May-2001  | Düsseldorf to Isla Margartia |
| WAS-35 | 11-June-2001 | Holguin to Düsseldorf        |
| WAS-36 | 25-June-2001 | Holguin to Düsseldorf        |
| WAS-37 | 9-July-2001  | Holguin to Düsseldorf        |
| WAS-47 | 27-Apr-2002  | Varadero to Düsseldorf       |

25 soil invasion and soil respiration are calculated from the  $\Delta^{17}O$  value of meteoric water (MW), as  $\Delta^{17}O_{SI} = \Delta^{17}O_{MW} + (\theta_{CO_2-H_2O} - 0.528)$  and  $\Delta^{17}O_R = \Delta^{17}O_{MW} + (\theta_{CO_2-H_2O} - 0.528) + (\theta_{diff-air} - 0.528) \times \ln\alpha_{diff-soil}$ .

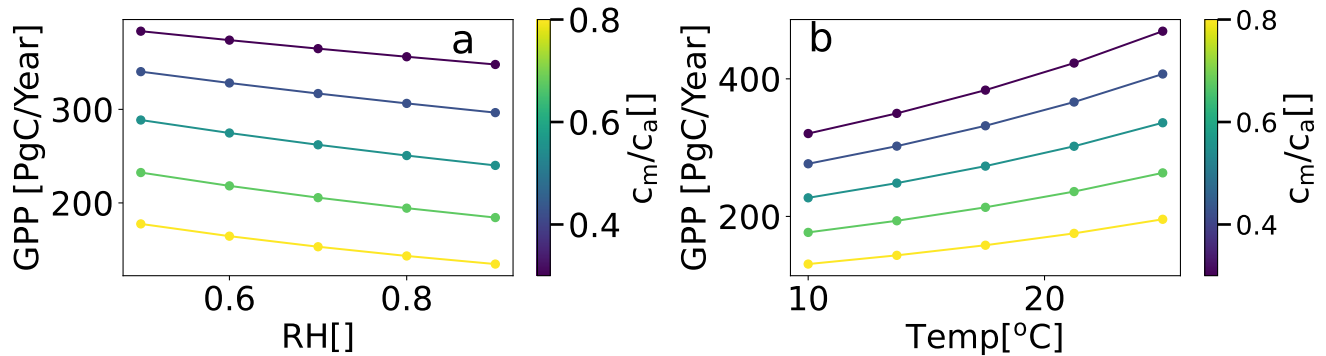

**Figure S3.** Sensitivity of GPP to relative humidity (a) and temperature (b), with different  $c_m/c_a$  ratios indicated by the color bar.

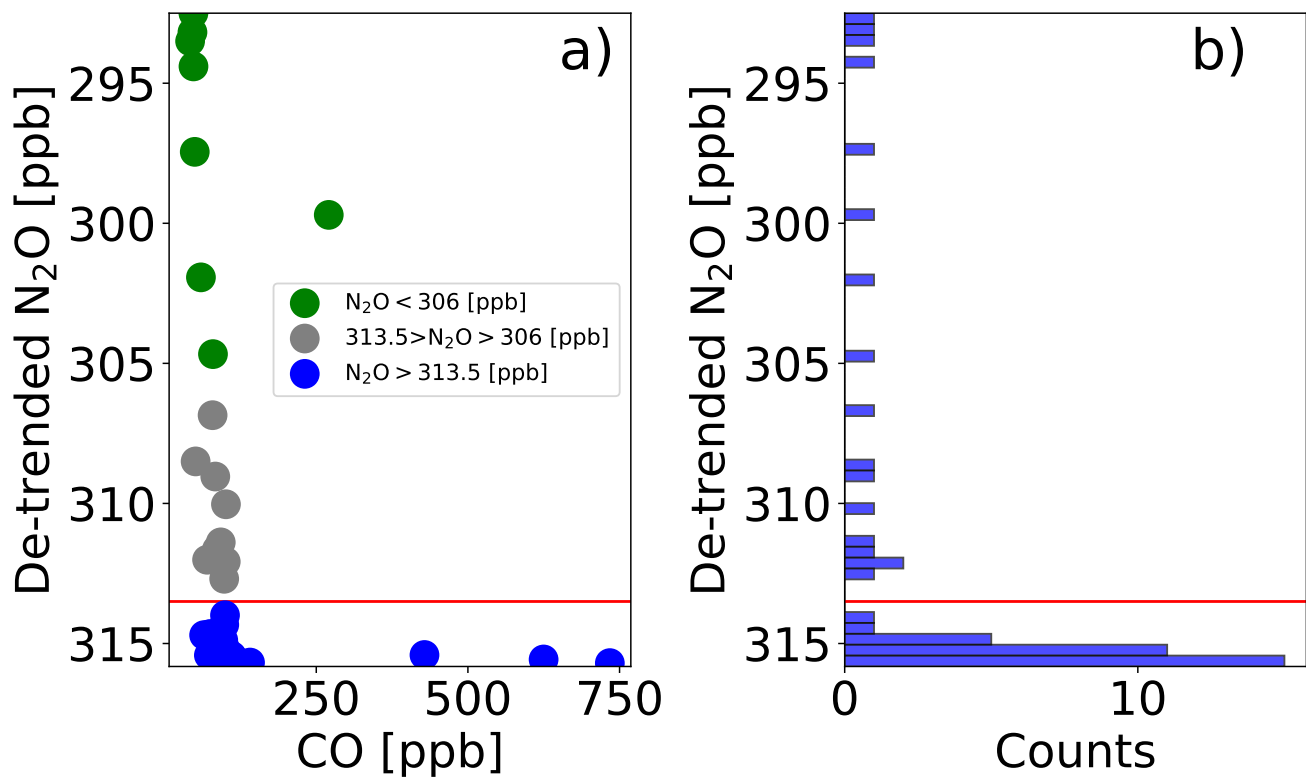

**Figure S4.** a) CARIBIC N<sub>2</sub>O data de-trended to the year 2001 versus CO. b) Histogram of CARIBIC N<sub>2</sub>O data de-trended to the year 2001. Red lines (313.5 ppb) indicate the cut-off between upper tropospheric and stratospheric air.

**Table S2.** Sampling altitude and coordinates, mole fraction of CO<sub>2</sub> and other trace gases, and the  $\delta^{13}\text{C}$ ,  $\delta^{17}\text{O}$ ,  $\delta^{18}\text{O}$ , and  $\Delta^{17}\text{O}$  values of CO<sub>2</sub> for CARIBIC samples. WAS stands for whole air sample.

| Sample    | Long   | Lat    | CH <sub>4</sub> | CO <sub>2</sub> | N <sub>2</sub> O | $\delta^{14}\text{CO}$ | O <sub>3</sub> | CO     | $\delta^{13}\text{C}$ | $\delta^{18}\text{O}$ | $\delta^{17}\text{O}$ | $\Delta^{17}\text{O}$ |
|-----------|--------|--------|-----------------|-----------------|------------------|------------------------|----------------|--------|-----------------------|-----------------------|-----------------------|-----------------------|
| WAS-25-1  | 16.01  | -18.05 | 1751.13         | 368.02          | 314.88           | 8.471                  | 60.28          | 96.62  | -8.023                | 39.307                | 20.294                | -0.266                |
| WAS-25-2  | 14.49  | -12.99 | 1744.27         | 368.7           | 314.67           | 8.387                  | 62.89          | 73.98  | -8.054                | 41.793                | 21.623                | -0.226                |
| WAS-25-3  | 12.91  | -7.95  | 1744.35         | 368.65          | 314.67           | 61.592                 | 65.49          | 75.55  | -8.073                | 41.997                | 21.754                | -0.201                |
| WAS-28-1  | 70.13  | 8.72   | 1770.9          | 366.74          | 315.37           | 5.528                  | 28.52          | 85.79  | -7.951                | 40.914                | 21.164                | -0.229                |
| WAS-29-2  | 66.77  | 12.88  | 1744.97         | 368.03          | 315.01           | 7.652                  | 57.94          | 94.99  | -8.014                | 42.289                | 21.881                | -0.224                |
| WAS-30-1  | 18.58  | -28.8  | 1728.63         | 368.59          | 314.7            | 8.565                  | 67.73          | 65.13  | -8.035                | 41.461                | 21.437                | -0.240                |
| WAS-30-2  | 17.71  | -23.78 | 1751.8          | 369.03          | 315.29           | 7.062                  | 63.57          | 90.08  | -8.042                | 42.330                | 21.915                | -0.212                |
| WAS-30-3  | 16.23  | -18.8  | 1746.11         | 368.48          | 315.3            | 6.694                  | 46.17          | 95.75  | -8.038                | 42.299                | 21.888                | -0.222                |
| WAS-30-4  | 14.7   | -13.72 | 1743.99         | 368.42          | 315.13           | 6.879                  | 44.82          | 98.83  | -8.027                | 42.311                | 21.885                | -0.232                |
| WAS-30-5  | 13.2   | -8.65  | 1767.5          | 367.76          | 315.43           | 6.931                  | 42.94          | 110.1  | -8.002                | 42.342                | 21.914                | -0.218                |
| WAS-30-6  | 11.15  | -3.69  | 1748.38         | 368.81          | 315.41           | -7.986                 | 89.67          | 428.4  | -8.033                | 42.084                | 21.792                | -0.207                |
| WAS-30-7  | 9.54   | 1.49   | 1776.6          | 369.77          | 315.68           | 8.129                  | 51.37          | 140.8  | -8.049                | 42.277                | 21.879                | -0.220                |
| WAS-30-8  | 9.18   | 7.3    | 1764.97         | 369.04          | 315.44           | 7.947                  | 44.86          | 96.92  | -8.034                | 41.837                | 21.661                | -0.211                |
| WAS-30-9  | 8.41   | 13.3   | 1759.65         | 369.06          | 315.52           | 7.862                  | 55.25          | 95.27  | -8.031                | 41.804                | 21.609                | -0.244                |
| WAS-30-10 | 7.88   | 19.14  | 1758.88         | 368.93          | 315.45           | 7.566                  | 49.79          | 93.12  | -8.031                | 41.828                | 21.651                | -0.216                |
| WAS-30-11 | 7.26   | 24.77  | 1770.74         | 368.58          | 315.17           | 10.169                 | 54.73          | 77.49  | -8.033                | 41.441                | 21.465                | -0.201                |
| WAS-30-12 | 6.85   | 30.18  | 1779.24         | 369.31          | 315.14           | 8.143                  | 40.09          | 82.53  | -8.077                | 41.284                | 21.377                | -0.208                |
| WAS-31-1  | 75.35  | 9.93   | 1763.85         | 369.87          | 315.62           | 7.251                  | 27.15          | 95.77  | -8.066                | 41.407                | 21.42                 | -0.229                |
| WAS-31-2  | 71.15  | 13.34  | 1767.7          | 370.03          | 315.57           | -8.035                 | 113.8          | 624.8  | -8.063                | 42.206                | 21.843                | -0.220                |
| WAS-31-3  | 67.04  | 16.52  | 1761.45         | 369.77          | 315.64           | 8.709                  | 58.75          | 111.4  | -8.055                | 42.209                | 21.837                | -0.227                |
| WAS-31-4  | 62.87  | 19.56  | 1757.4          | 369.61          | 315.61           | 8.126                  | 51.62          | 102    | -8.054                | 41.976                | 21.713                | -0.230                |
| WAS-31-10 | 40.79  | 40.41  | 1753.95         | 369.27          | 312.01           | 35.816                 | 146.5          | 69.99  | -8.082                | 41.307                | 21.464                | -0.135                |
| WAS-31-11 | 34.43  | 42.79  | 1734.7          | 368.31          | 308.5            | 59.519                 | 238.8          | 51.1   | -8.042                | 41.652                | 21.727                | -0.052                |
| WAS-32-1  | 74.9   | 10.3   | 1748            | 371.21          | 315.68           | 6.471                  | 51.1           | 86.29  | -8.113                | 41.902                | 21.694                | -0.211                |
| WAS-32-2  | 70.48  | 13.87  | 1745.58         | 371.01          | 315.52           | 6.55                   | 46.73          | 83.49  | -8.123                | 41.537                | 21.497                | -0.219                |
| WAS-32-3  | 66.1   | 17.22  | 1737.53         | 370.51          | 315.42           | 5.889                  | 42.46          | 72.97  | -8.097                | 41.967                | 21.715                | -0.224                |
| WAS-32-12 | 22.53  | 46.53  | 1756.2          | 371.74          | 312.08           | 26.277                 | 136.2          | 100.77 | -8.188                | 41.769                | 21.703                | -0.135                |
| WAS-33-1  | -70.36 | 21.7   | 1750.6          | 373.2           | 315.7            | -8.202                 | 89.83          | 734    | -8.217                | 41.662                | 21.562                | -0.219                |
| WAS-33-2  | -64.63 | 24.14  | 1748.2          | 372.83          | 315.68           | 7.681                  | 26.95          | 89.08  | -8.200                | 41.817                | 21.636                | -0.225                |
| WAS-33-3  | -59.14 | 27.34  | 1755.85         | 372.97          | 315.82           | 6.597                  | 33.79          | 95.18  | -8.211                | 41.827                | 21.636                | -0.230                |
| WAS-33-6  | -40.34 | 35.8   | 1796.6          | 373.26          | 315.47           | 11.774                 | 86.19          | 111.6  | -8.244                | 42.066                | 21.771                | -0.219                |
| WAS-33-7  | -33.58 | 38.68  | 1774.85         | 373.83          | 314.33           | 14.476                 | 75.83          | 98.29  | -8.281                | 41.810                | 21.681                | -0.177                |
| WAS-33-8  | -26.6  | 41.13  | 1760.55         | 372.91          | 311.39           | 25.412                 | 151.6          | 92.54  | -8.233                | 41.908                | 21.892                | -0.108                |
| WAS-33-9  | -19.64 | 43.11  | 1650.2          | 368.25          | 293.5            | 80.51                  | 467.8          | 42.01  | -8.040                | 41.623                | 22.107                | 0.335                 |
| WAS-33-10 | -12.94 | 45.69  | 1673.15         | 369.12          | 297.45           | 71.902                 | 410.6          | 49.67  | -8.075                | 41.833                | 22.11                 | 0.231                 |
| WAS-34-1  | -0.01  | 51.22  | 1796.05         | 373.44          | 315.54           | 13.464                 | 104            | 103.6  | -8.247                | 41.680                | 21.577                | -0.214                |
| WAS-34-7  | -39.81 | 43.02  | 1698.67         | 370.42          | 301.93           | 54.689                 | 332.4          | 59.86  | -8.129                | 41.727                | 21.969                | 0.146                 |
| WAS-34-9  | -48.46 | 35.4   | 1768.8          | 373.61          | 313.99           | 14.607                 | 92.11          | 99.54  | -8.254                | 41.680                | 21.613                | -0.178                |
| WAS-35-8  | -23.18 | 46.51  | 1734.97         | 370.57          | 306.85           | 33.555                 | 250.9          | 79.08  | -8.118                | 42.067                | 21.974                | -0.021                |
| WAS-35-11 | 3      | 49.04  | 1683.88         | 370.14          | 299.7            | 53.924                 | 372.2          | 270.6  | -8.106                | 42.041                | 22.159                | 0.174                 |
| WAS-36-1  | -77.31 | 26.05  | 1752.5          | 373.26          | 315.28           | 7.49                   | 59.43          | 77.71  | -8.204                | 41.844                | 21.658                | -0.222                |
| WAS-36-6  | -54.89 | 49.77  | 1756.8          | 371.35          | 311.64           | 19.566                 | 165            | 86.31  | -8.138                | 41.915                | 21.823                | -0.091                |
| WAS-36-8  | -33.95 | 52.79  | 1742.06         | 370.94          | 309.04           | 26.688                 | 208.4          | 83.5   | -8.116                | 41.936                | 21.899                | -0.028                |
| WAS-36-9  | -23.89 | 53.21  | 1644.66         | 368.67          | 292.5            | 68.248                 | 474.9          | 47.46  | -8.046                | 41.654                | 22.169                | 0.379                 |
| WAS-36-10 | -14.2  | 53.1   | 1719.25         | 370.47          | 304.67           | 38.401                 | 244.2          | 79.72  | -8.111                | 41.819                | 21.938                | 0.070                 |
| WAS-37-1  | -72.23 | 23.16  | 1759.8          | 371.46          | 315.38           | 7.669                  | 62.36          | 76.7   | -8.139                | 41.860                | 21.688                | -0.196                |
| WAS-37-12 | 0.61   | 51.92  | 1770.65         | 369.84          | 310.03           | 24.511                 | 175.4          | 101.1  | -8.097                | 41.952                | 21.882                | -0.053                |
| WAS-47-5  | -57.34 | 36.98  | 1757.86         | 374.66          | 312.69           | 27.139                 | 131.4          | 98.2   | -8.252                | 42.030                | 21.872                | -0.101                |
| WAS-47-11 | -10.21 | 49.73  | 1653.2          | 369.9           | 294.4            | 53.034                 | 441            | 47.57  | -8.057                | 41.866                | 22.145                | 0.249                 |
| WAS-47-12 | -1.27  | 51.53  | 1646.6          | 369.73          | 293.18           | 86.573                 | 461.7          | 45.88  | -8.048                | 42.076                | 22.344                | 0.337                 |

**Table S3.** Sampling altitude and coordinate, mole fraction of CO<sub>2</sub> and other trace gases and the  $\delta^{13}\text{C}$ ,  $\delta^{17}\text{O}$ ,  $\delta^{18}\text{O}$  and  $\Delta^{17}\text{O}$  of CO<sub>2</sub> for StratoClim samples

| Sample Name | Alt[KM] | Lat   | Long  | N <sub>2</sub> O | O <sub>3</sub> | CH <sub>4</sub> | CO <sub>2</sub> | CO   | $\delta^{13}\text{C}$ | $\delta^{17}\text{O}$ | $\delta^{18}\text{O}$ | $\Delta^{17}\text{O}$ |
|-------------|---------|-------|-------|------------------|----------------|-----------------|-----------------|------|-----------------------|-----------------------|-----------------------|-----------------------|
| KL_F3_08    | 15.398  | 33.79 | 30.95 | 327.02           |                | 1907            | 384.75          | 88   | -8.552                | 21.962                | 42.484                | -0.244                |
| KL-FL2-12   | 11.881  | 41.01 | 23.97 | 323.65           |                | 1832.9          | 402.72          | 51   | -8.707                | 27.249                | 43.117                | -0.139                |
| KL-FL2-13   | 10.685  | 40.91 | 23.67 | 326.85           |                | 1886.6          | 401.62          | 79   | -8.600                | 42.518                | 40.464                | -0.267                |
| KL-FL3-05   | 17.57   | 34.65 | 27.34 | 320.35           |                | 1818.7          | 405.11          | 33   | -8.772                | 17.785                | 43.566                | -0.038                |
| KL_F3_07    | 17.607  | 33.82 | 29.72 | 317.470          |                | 1824            | 402.07          | 38   | -8.766                | 21.917                | 42.072                | -0.079                |
| KL-FL3-01   | 14.834  | 36.56 | 22.58 | 317.23           |                | 1793.4          | 403.97          | 34   | -8.502                | 18.302                | 42.806                | 0.049                 |
| KL-FL3-04   | 17.545  | 35.11 | 26.12 | 311.74           |                | 1772.9          | 405.62          | 29   | -8.720                | 15.173                | 42.585                | 0.177                 |
| KL-FL3-03   | 17.545  | 35.58 | 24.89 | 311.5            |                | 1761            | 403.63          | 27   | -8.752                | 14.430                | 42.898                | 0.133                 |
| KL-FL2-05   | 18.418  | 34.54 | 25.68 | 300.32           | 490            | 1723            | 401.61          | 17   | -8.729                | 8.799                 | 43.341                | 0.140                 |
| KL-FL2-11   | 20.009  | 40.34 | 24.95 | 279.24           |                | 1629            | 399.83          | 14   | -8.715                | 7.530                 | 44.325                | 0.409                 |
| KL-FL2-07   | 19.428  | 35.39 | 27.54 | 277.49           | 850            | 1622.3          | 399.21          | 16   | -8.684                | 8.255                 | 44.272                | 0.404                 |
| KL-F3-10    | 19.467  | 33.60 | 30.42 | 275.59           |                | 1635.8          | 400.11          | 21   | -8.610                | 11.269                | 43.900                | 0.453                 |
| KL-FL2-08   | 19.417  | 36.70 | 27.07 | 268.32           | 1052           | 1584.3          | 398.6           | 20   | -8.829                | 10.809                | 44.003                | 0.522                 |
| KL-FL2-10   | 19.98   | 39.06 | 25.57 | 260.43           |                | 1542.1          | 397.4           | 18   | -8.445                | 9.549                 | 43.509                | 0.683                 |
| KL_F3_12    | 20.01   | 34.52 | 27.79 | 255.67           |                | 1505            | 392.03          | 17   | -8.527                | 23.133                | 42.101                | 1.095                 |
| KL-FL3-14   | 20.231  | 35.1  | 26.1  | 240.1            |                | 1493.1          | 397.15          | 17   | -8.569                | 8.762                 | 43.478                | 1.095                 |
| KT-FL4-04   | 17.182  | 29.1  | 81.7  | 330.29           | 131            | 1913            |                 | 67   | -8.720                | 36.082                | 42.941                | -0.182                |
| KT_FL2_04   | 15.5655 | 29.2  | 81.6  | 329.03           | 89             | 1890.7          |                 | 67   | -8.904                | 20.930                | 40.452                | -0.224                |
| KT-FL2-02   | 15.814  | 28.4  | 83.5  | 328.39           | 70             | 1902            |                 | 67   | -8.682                | 36.009                | 40.735                | -0.225                |
| KT-FL5-15   | 18.168  | 28.1  | 84.2  | 328.39           | 212            | 1872            |                 | 32   | -8.765                | 17.073                | 42.790                | -0.154                |
| KT-FL2-09   | 17.457  | 28.1  | 84.3  | 328.16           | 157            | 1890            |                 | 59   | -8.522                | 31.642                | 43.266                | -0.180                |
| KT_FL5_07   | 16.9725 | 28.6  | 83.0  | 327.880          | 101            | 1878.9          |                 | 81   | -8.542                | 21.204                | 41.058                | -0.263                |
| KT-FL2-05   | 16.958  | 29.2  | 80.9  | 327.2            | 124            | 1882            |                 | 57   | -8.896                | 30.281                | 41.541                | -0.145                |
| KT-FL2-03   | 16.009  | 28.8  | 82.6  | 327              | 77             | 1892            |                 | 69   | -8.719                | 37.268                | 41.990                | -0.141                |
| KT_FL3_2    | 16.5215 | 25.7  | 84.4  | 326.95           | 119            | 1880.1          |                 | 57   | -8.765                | 20.491                | 39.622                | -0.233                |
| KT-FL4-10   | 18.184  | 27.7  | 85.4  | 326.86           | 182            | 1859            |                 | 45   | -8.806                | 24.099                | 43.099                | -0.188                |
| KT_FL5_16   | 17.77   | 28.6  | 83.1  | 326.56           | 240            | 1832.3          |                 | 23   | -8.72                 | 21.399                | 41.212                | -0.134                |
| KT-FL4-09   | 17.888  | 28.0  | 84.5  | 325.63           | 168            | 1879            |                 | 50   | -8.763                | 26.541                | 41.902                | -0.167                |
| KT-FL2-01   | 13.253  | 28.1  | 84.3  | 325.26           | 40             | 1892            |                 | 79   | -8.549                | 42.594                | 41.234                | -0.179                |
| KT_FL3_08   | 17.3735 | 21.4  | 79.7  | 322.61           | 145            | 1829.5          |                 | 43   | -8.764                | 21.518                | 41.315                | -0.086                |
| KT_FL3_10   | 19.797  | 22.5  | 79.6  | 282.13           | 771            | 1663            |                 | 24   | -8.593                | 12.641                | 42.102                | 0.417                 |
| KT-FL3-16   | 20.198  | 25.2  | 83.1  | 280.68           | 887            | 1645            |                 | 23   | -8.708                | 12.237                | 41.619                | 0.428                 |
| KT_FL2_16   | 20.271  | 28.3  | 83.9  | 278.38           | 1048           | 1629            |                 | 17   | -8.604                | 9.176                 | 42.986                | 0.375                 |
| KT-FL3-11   | 20.168  | 23.0  | 80.3  | 277.04           | 929            | 1624            |                 | 22.3 | -8.632                | 11.817                | 41.434                | 0.464                 |
| KT_FL2_18   | 20.325  | 29.1  | 81.7  | 269.27           | 1061           | 1601            |                 | 18   | -8.563                | 9.416                 | 41.939                | 0.741                 |

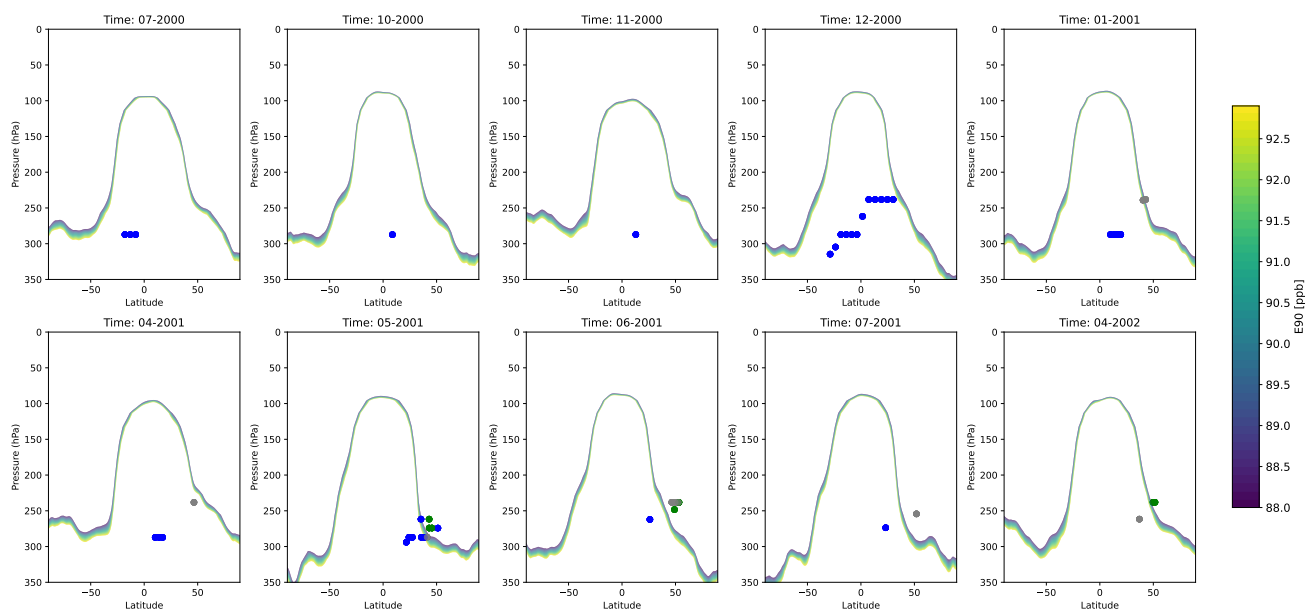

**Figure S5.** Zonal average tropopause (pressure altitude versus latitude) as modeled with the TM5 model, together with locations of the collected samples analysed in this study. The color bar specifies the artificial transport tracer E90, which is the tracer with surface emissions and an atmospheric lifetime of 90 days (E90) (Krol et al., 2018). The data points are colored in three groups based on their  $N_2O$  values, blue marker for  $N_2O \geq 313.5$  ppb, gray marker for  $313.5 > N_2O > 306$  ppb and black marker for  $N_2O < 306$  ppb.

## References

- Adnew, G. A., Pons, T. L., Koren, G., Peters, W., and Röckmann, T.: Leaf-scale quantification of the effect of photosynthetic gas exchange on  $\Delta^{17}\text{O}$  of atmospheric  $\text{CO}_2$ , *Biogeosciences Discuss.*, 2020, 1–37, <https://doi.org/10.5194/bg-2020-91>, 2020.
- 30 Krol, M., De Bruine, M., Killaars, L., Ouwersloot, H., Pozzer, A., Yin, Y., Chevallier, F., Bousquet, P., Patra, P., Belikov, D., et al.: Age of air as a diagnostic for transport timescales in global models, *Geoscientific Model Development*, 11, 3109–3130, 2018.
