# Supplementary material for: Triple oxygen isotope composition of CO 2 in the upper troposphere and stratosphere
Source: Copernicus journal article supplement (doi:10.5194/egusphere-2024-3231), 2024-11-13
Supplement: Supplementary file [file egusphere-2024-3231-AC1-supplement.pdf]

From: Getachew Agmuas Adnew and co-authors

Anonymous Referee #1

We thank referee 1 for the constructive feedback and suggestions on how to revise the manuscript. The answers to the questions/ comments and suggestions are stated below each comment in blue. *Paragraphs that are modified in the revised manuscript are shown in blue (italics).*

This work presented high-precision measurement results of CO<sub>2</sub> triple oxygen isotopes from upper troposphere lower stratosphere air samples up to 21 km collected during past aircraft campaigns. The results are interesting as it showed distinct relationship between triple oxygen isotopic compositions and N<sub>2</sub>O for air in the upper troposphere vs. lower stratosphere. Such observation is critical to enable CO<sub>2</sub> triple oxygen isotopes as a tool to understand stratosphere-troposphere exchange, as well as global carbon cycle. This work highlighted the importance of high-precision triple oxygen isotopes measurements during quantification of the downward net isoflux of O-MIF signal. While the presentation of the results is clear, interpretation of the data is mostly adequate, I have a few minor general comments:

We appreciate your kind words about our work presented in the manuscript and your valuable comments.

1. It would be great if there is more discussion about the de-coupling of chemical mechanisms of CO<sub>2</sub>-O<sup>17</sup> generation and N<sub>2</sub>O loss in the stratosphere due to stratospheric dynamics (Lines **325 - 344**). The CO<sub>2</sub>-O<sup>17</sup> signal is originated from ozone chemistry, therefore the path history (O<sup>18</sup>D abundance vary greatly in the stratosphere) and age of the air parcel are both important; while N<sub>2</sub>O is more sensitive to altitude as the photochemical lifetime of N<sub>2</sub>O decrease exponentially in the stratosphere. Therefore, air parcels that are relatively “young” but have been to mid-stratosphere (~30 km) could have significant N<sub>2</sub>O loss but low O<sup>17</sup>, and vice versa. Clarifying some of these mechanisms could be useful.

In section 2.2 of the revised manuscript, we included the following paragraphs for clarification:

*The isotopic composition of CO<sub>2</sub> in the upper stratosphere and mesosphere provides a unique tool for studying atmospheric transport and chemistry [Wiegler et al. 2013; Liang et al., 2007, 2008, Boering et al., 2004]. The  $\Delta^{17}\text{O}$  of CO<sub>2</sub> is primarily modified by O(<sup>1</sup>D), which is produced photochemically by O<sub>3</sub> photolysis. However, the relevant isotope effects occurring in the stratosphere are still not yet well enough understood [Wiegler et al. 2013; Liang et al., 2007, 2008]. Nevertheless, an empirical estimate of the isotope flux*

*from the stratosphere can be derived from measurements near the tropopause, like the ones presented here*

*In the stratosphere  $\text{CO}_2$  and  $\text{N}_2\text{O}$  isotopes are influenced by different processes.  $\text{N}_2\text{O}$  is mainly destroyed by  $\text{N}_2\text{O}$  photolysis but is also affected by  $\text{O}(^1\text{D})$  in the lower stratosphere and upper troposphere. Since  $\text{N}_2\text{O}$  photolysis and  $\text{O}_3$  photolysis occur at different wavelengths, the relationship between  $\Delta^{17}\text{O}(\text{CO}_2)$  and  $\text{N}_2\text{O}$  contains valuable information about atmospheric chemistry and transport. The lifetime of  $\text{N}_2\text{O}$  varies with altitude. In the upper stratosphere and mesosphere, the  $\text{N}_2\text{O}$  lifetime decreases, leading to greater scatter between the two tracers.  $\Delta^{17}\text{O}(\text{CO}_2)$  values increase with altitude as  $\text{N}_2\text{O}$  mixing ratios decrease below  $\sim 70$  km. However, above 70 km,  $\Delta^{17}\text{O}(\text{CO}_2)$  begins to decrease with further decreases in  $\text{N}_2\text{O}$  mixing ratios. However, in the lower most stratosphere and upper troposphere, where the lifetime of  $\text{N}_2\text{O}$  against photolysis is longer than the transport time, the scatter in  $\text{N}_2\text{O}$  values remains low. The  $\Delta^{17}\text{O}$ – $\text{N}_2\text{O}$  correlation remains consistent both spatially and temporally in the lowermost stratosphere and upper troposphere (Liang et al., 2007, 2008). Since the net isotope flux of  $\Delta^{17}\text{O}$  is derived from samples from the lower stratosphere and upper troposphere, the observed variability (scatter) in the stratosphere does not affect the global average  $\Delta^{17}\text{O}$ – $\text{N}_2\text{O}$  slope used to estimate the flux of  $\Delta^{17}\text{O}$  from the stratosphere to the troposphere.*

2. More discussion may be needed to support the argument that the slope from CARIBIC samples can represent a “global average”  $\text{N}_2\text{O}$ – $\text{O}^{17}$  slope. Because of the observed potential “de-coupling” of  $\text{N}_2\text{O}$ – $\text{O}^{17}$  slope, it could be useful to discuss what are the potential factors that could result in different slopes. If the well-mixed upper trop air from CARIBIC represents global average slope, StratoClim gives you “below average” slope, where can you anticipate “higher than average” slopes? How will such variations impact the uncertainty of the global average slope?

[See our reply to the previous comment.](#)

3. If the uncertainty in “global average” slope changed because of 1) and 2), how does it impact the uncertainties in global estimation of  $\text{O}^{17}$  isoflux?

[See previous comment](#)

More detailed comments:

Sections 2.2 & 2.3: since these were not mentioned until section 5, maybe considering moving these down (after 2.5) a little bit?

Thank you very much for your suggestion. In the revised manuscript we moved section 2.2 and 2.3 to appear after 2.5.

Line 174: maybe briefly mention how age of air is calculated?

In the revised manuscript we included a reference to the publication that was used to calculate the age of air.

*The age of air was calculated using SF<sub>6</sub> measurements as described in detail by Krol et al., 2018.*

Line 249: CO<sub>2</sub> not CH<sub>2</sub>.

Thank you very much for spotting this. In the revised manuscript the typo is corrected.

Figure 5: subpanel titles (a, b, c, d) are not lined up.

In the revised manuscript the subpanel title is aligned.

Figures 3-8:  $\Delta^{17}\text{O}$  is used in your text but in figures you used " $\Delta^{17}\text{O}$ ", please consider using consistent notations.

In the revised manuscript we have changed the  $\Delta^{17}\text{O}$  in the figure label to  $\Delta^{17}\text{O}$ .

Line 368: uncertainty inconsistent with figure.

Thank you very much for pointing out the inconsistency, in the revised manuscript the uncertainty indicator in the figures has been corrected to be consistent with the text.

Lines 388 & 394: repetitive sentences.

In the revised manuscript the repeated sentence has been deleted.

## References

Wiegel, A. A., Cole, A. S., Hoag, K. J., Atlas, E. L., Schauffler, S. M., and Boering, K. A.: Unexpected variations in the triple oxygen isotope composition of stratospheric carbon dioxide, PNAS, 110, 17 680–17 685, <https://doi.org/10.1073/pnas.1213082110>, 2013.

Liang, M.-C., Blake, G. A., and Yung, Y. L.: Seasonal cycle of C<sub>16</sub>O<sub>16</sub>O, C<sub>16</sub>O<sub>17</sub>O, and C<sub>16</sub>O<sub>18</sub>O in the middle atmosphere: Implications for mesospheric dynamics and biogeochemical sources and sinks of CO<sub>2</sub>, J. Geophys. Res. Atmos., 113, D12, 2008.

Liang, M.-C., Geoffrey, A. B., Brenton, R. L., and Yung, Y. L.: Oxygen isotopic composition of carbon dioxide in the middle atmosphere, PNAS, 104, 5, 2007.

Boering, K. A., Jackson, T., Hoag, K. J., Cole, A. S., Perri, M. J., Thiemens, M., and Atlas, E.: Observations of the anomalous oxygen isotopic composition of carbon dioxide in the lower stratosphere and the flux of the anomaly to the troposphere, Geophys. Res. Lett., 31, 2004.

Krol, M., De Bruine, M., Killaars, L., Ouwersloot, H., Pozzer, A., Yin, Y., Chevallier, F., Bousquet, P., Patra, P., Belikov, D., et al.: Age of air as a diagnostic for transport timescales in global models, Geoscientific Model Development, 11, 3109–3130, 2018.
